# Supplementary material for: Impact of meteorological conditions on BVOC emission rate from Eastern Mediterranean vegetation under drought
Source: Copernicus journal article supplement (doi:10.5194/egusphere-2024-529), 2024-03-20
Supplement: Supplementary file [file egusphere-2024-529-AC2-supplement.pdf]

We thank Referee #1 for reviewing our manuscript and for his/her critical and constructive comments. In the following, the comments by the reviewer (in italic blue font) are followed by our detailed responses.

*Li et al., in their article "Impact of meteorological conditions on BVOC emission rate from Eastern Mediterranean vegetation under drought", report the results from a field experiment conducted in Ramat Hanadiv Nature Park (Israel) to investigate the effect of drought on BVOC emissions from vegetation. They selected the species Phillyrea latifolia for their study. BVOC emissions from six branches were analysed between September and October 2020. After collecting BVOC emissions under natural drought conditions for a day, the plants were irrigated with a moderate amount of water, corresponding to about 5.5–7 mm of precipitation and BVOC emissions were again sampled on the following day.*

*BVOC emissions of Phillyrea latifolia were dominated by monoterpenes (MTs) and sesquiterpenes (SQTs) were also detected. The authors found that during the natural drought period, BVOC emissions were better correlated with changes in environmental parameters (especially relative humidity, RH), rather than with their absolute values.*

*The manuscript is well-structured and follows mostly a logical presentation. At times, some clarification would be needed. The results, even though derived only from one species, offer a framework that is potentially important to modelling of BVOC emissions under drought conditions. It is expected that similar experiments will be performed in the future with other species. I only have minor comments and a few technical comments (see below), which are mostly to clarify a few aspects of the method as well as to add to the discussion of the results. Therefore, I recommend accepting the manuscript with minor corrections to address the comments.*

*Minor comments:*

*I. 156: The authors write that the adsorbent tube have been 'precoated', however, I assume that the tubes are filled with adsorbent materials and not only 'coated'. Is that right?*

**Response:** Yes, thank you for pointing it out. It was a misuse of the word. We have changed the term to “filled”.

*I. 185: The authors write that 'the calibration analytes were injected [...] onto clean sorbent tubes [...] at a nitrogen flow of 80 mL min<sup>-1</sup>'. Can the authors add for how long the sorbent tubes were flushed with nitrogen after injection? And maybe the injected volume (even though it's mentioned in the supplementary material, it might be worth mentioning it here).*

**Response:** The sorbent tubes were flushed with nitrogen after injection for 5 minutes. This information as well as the injected volume have been added to the revised version.

*II. 208-210: The way the reference samplings were performed is unclear. The authors write that 'Prior to the reference sampling, the system and branches were given at least 60 min to adapt'. Do they mean 'after the reference sample and prior to the first sampling from the branch'? Also, they write 'After the 10<sup>th</sup> sampling on the second measurement day [...], the*

*sampled branch was cut [...]'. Is there a reason that this was not done after the 9<sup>th</sup> sampling and before the last reference sample? Has the same branch been taken out of the Tedlar bag before the irrigation and allowed again to adapt after the first reference sampling of the second day? The schematic in Fig. 2 helps, but the authors could be more explicit about the reference samples and taking the branch in and out of the bag.*

**Response:** Thank you for the correction. There was indeed an error with the given information. On each measurement day, the adaptation time was included after the reference sampling and prior to the first branch sampling. Regarding the branch cutting, it was done after the last reference sampling. However, it is true that it could also be done between the 9<sup>th</sup> sampling, considering that the branch is not needed for the reference.

In the revised version, we specify that the branch cutting was performed after the 9<sup>th</sup> sampling on the second measurement day of each 2-sequential-day period, to avoid confusion. To address all these issues, we have revised the original text as follows:

“On each measurement day, after completing the first sampling for reference, the system and branches were allowed at least 60 minutes to adapt to the different conditions after placing the branch into the bag and setting up the equipment. At the end of the first measurement day, the sampled branch was removed from the bag and returned after the reference sampling on the second day. Following the 9<sup>th</sup> sampling on the second measurement day of each two-sequential-day period, the sampled branch was cut and sent to the laboratory for leaf analysis.”

*ll. 211-216: The authors write 'Leaf net dry weight and area were evaluated within 24h', is that simply the net weight, as the drying occurs later, for 72h at 60°C?*

**Response:** The original sentence was incorrect. Indeed, within 24h, we only took the wet weight and scanned the leaves. The net weight was determined after drying for 72 h. The text was revised as follows:

“Leaf wet weight and area were evaluated within 24 h after cutting the branch. .... The leaves were then dried for 72 h at 60 °C, and their net dry weight was recorded.”

*ll. 218-221: The authors describe which five compounds were chosen for quantification by GC-MS, stating that they are the ones with 'the highest sampled mass'. Could the author state if that is true for all individual branches or from combining all the results from all the branches? From Figs. 4 and 5, 'other' MTs and SQTs appear (see further comment below), meaning that they have also been quantified. Can the authors explain how they quantified the other compounds?*

**Response:** Thank you for pointing out this issue. The same five compounds were most abundant for all branches, as we specify in the revised version:

“Of the identified species, one MT and four SQT compounds (cis- $\beta$ -ocimene,  $\beta$ -caryophyllene,  $\alpha$ -humulene,  $\alpha$ -farnesene, and germacrene D) with the highest sampled mass for all branches were chosen for quantification by GC–MS (see Sect. 2.3).”

In the revised manuscript, we state that “The daily average emission rate of MTs over all sampling days ranged from 11.7 to 2151.4 ng cm<sup>-2</sup> h<sup>-1</sup> (0.89–121.5  $\mu$ g g<sup>-1</sup> h<sup>-1</sup>), with cis- $\beta$ -ocimene being the most abundant for all sampled branches, averaging at 88% of all

detected MTs”. As for SQTs, we state: “The four most abundant detected SQTs for all sampled branches were  $\beta$ -caryophyllene,  $\alpha$ -humulene, germacrene D, and  $\alpha$ -farnesene. These compounds comprised 90% of all detected SQTs, from all the branches together.” The explanation about quantification for other MTs and SQTs has been added as follows: “As for the minor MTs and SQTs, the calibration curve of *cis*- $\beta$ -ocimene (E, Z) and the averaged calibration curve of the four most abundant SQTs were used for a rough estimation of their emission rates.”

*Sect. 2.4.3: Here I have been wondering if I understand the approach correctly. Is it so that the time of the last step (n) is the time when the BVOC sampling ends? So there are three 'steps' that are happening during the sampling, but the BVOC emission rate is an average over these 30 minutes. Have the authors considered using the time in the middle of the sampling period and have 30 minutes steps? Would these lead to similar results, but with n=3? This section might need some clarification regarding the different time steps and the assumptions made.*

**Response:** Yes, the last step (n) is when the sampling ends. In principle, if we select the time step of the meteorological parameter’s measurement as 30 min instead of 10 min, with n=3, the  $\delta_{RH}$  and  $\delta_T$  would have similar values. However, we have chosen to calculate the  $\delta_{RH}$  and  $\delta_T$  using the timeframe starting 60 min prior to sampling and ending at the end of sampling because this approach was found to yield the highest correlation between  $\delta_{RH}$  and  $\delta_T$  and BVOCs emission rate. On lines 262-263 it is mentioned that this calculation method is based on a preliminary test. We applied 10-minute time step, rather than 30 min step, to achieve the highest accuracy for  $\delta_{RH}$  and  $\delta_T$ . In the revised version we clarify that: we applied “10 min time step, according to the available measurement frequency....”.

*l. 281 (Eq. 6): Also here is it a bit unclear what is 'n' if i=1 indicates the daily minimum. Is AET measured for each emission rate following the minimum? Should AET then by definition be always positive? Or it does not have to do with the minimum around noon-time? Or is this only valid for the drought period and for the irrigation experiment it is simply the first sample after noon? Please clarify.*

**Response:** Thanks for pointing out this confusion. AET was calculated using all measured emissions following the noontime minimum, while the minimum itself was determined as the lowest BVOC emission rate between 12:00 and 14:00.

Considering that the emission rate after 14:00 could be smaller than this minimum between 12:00 and 14:00, AET could be negative. To keep our evaluation consistent, AET for the irrigation experiment was evaluated using the same procedure. We have excluded “daily” in the phrase “the daily minimum around noontime” (lines 282-283) to avoid confusion.

*Sect. 3.3: This section would benefit from reorganization. My understanding is that PCA analysis has been done for each branch individually (Fig. 6), while the Pearson's values have been averaged? Is there a specific reason why PCA could not be done on the entire dataset? Also between lines 402 and 405, the authors mention average Person's values for MTs and SQTs with respect to  $\delta_{RH}$  and  $\delta_T$  as well as for RH and T. Are the two respective*

*values in bracket for MTs with respect to both variables and then SQTs with respect to these same two variables? This could be clarified. Also, why have the authors decided to report selected Pearson's values for the PCA and not all? They don't seem to be easily derived from Fig. 6.*

**Response:** The PCA analysis was conducted separately for each branch due to the large variation in emission rates either across branches, or due to irrigation. On some days, the emission rate ranged from 2 to 5 ng cm<sup>-2</sup> h<sup>-1</sup>, while on other days, it ranged 1000-3000 ng cm<sup>-2</sup> h<sup>-1</sup>. As a result, performing PCA on the entire dataset would be statistically meaningless. In accordance with the explanations given above, Pearson's values were calculated separately for each branch and each sampling day. These values were averaged across MTs SQTs, all six branches and all sampling days, resulting in 4 different values individually for each of the investigated meteorological parameters: T, RH,  $\delta$ RH and  $\delta$ T. Accordingly, we have added the following text to the revised version: “Due to the large variation in BVOC emissions across different branches, the r values were calculated separately for each branch and each sampling day.”

Regarding the Pearson's values which are reported between lines 402 and 405, the r value was averaged incorporating both MTs and SQTs emission rates. In the first bracket, the two r values refer to  $\delta$ RH and  $\delta$ T, while in the second one they refer to RH and T. We have revised the sentence for clarity:

“...the emission rates of measured BVOC (including both MTs and SQTs) were better correlated with  $\delta_{RH}$  and  $\delta_T$  (average Pearson's value (r) of 0.56 and -0.61, respectively) than with RH and T (r of -0.22 and 0.29, respectively).”

*Fig. 6: In this figure, is it assumed that the x-axis is the first factor and the y-axis the second factor of the PCA analysis?*

**Response:** Yes, we have added this information to the axes title.

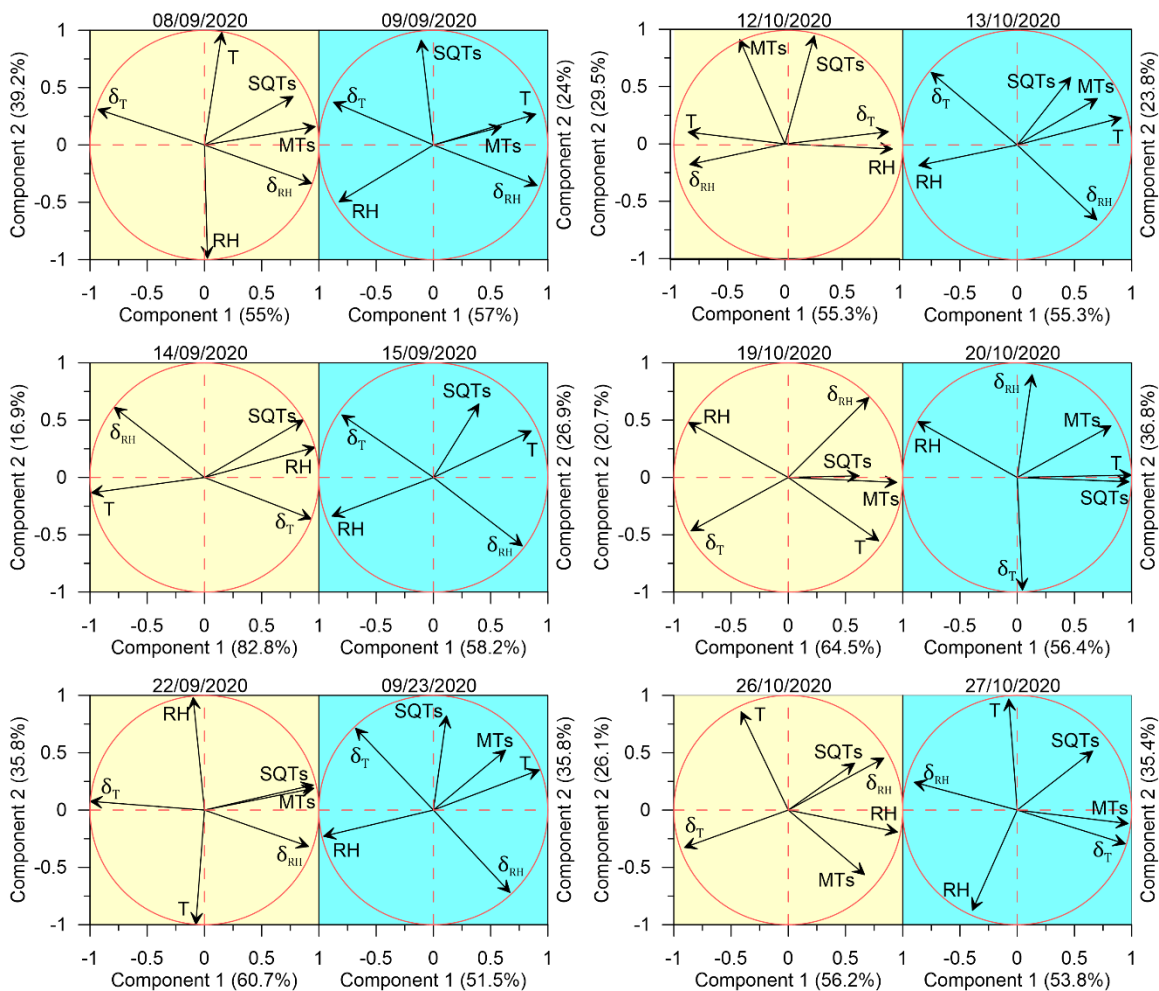

*ll. 462-465: How do the authors reconcile that while  $\delta RH$  is a better proxy (for drought conditions), the correlations are too weak to predict emissions. What about multiple regressions? Could that be an option rather than use  $\delta RH$  only with additional studies?*

**Response:** While our study reveals that  $\delta RH$  showed the highest correlation with BVOC emission rates compared with all tested meteorological parameters (as well as with vapor pressure deficit (VPD), solar radiation and their temporal gradients, which are not discussed in the manuscript), this correlation is not high enough to accurately predict the BVOCs emission rates by modelling. Additional studies may lead to improvements in utilizing our findings for modelling predictions.

VPD and its instantaneous changes showed similar but lower correlation with BVOC emission rates compare with T, RH, and their instantaneous changes. To address the reviewer’s comment, we tested multiple regression by using T and RH, as well as  $\delta T$  and  $\delta RH$ , as two independent parameters. This regression was performed for each sampling day individually. However, this regression did not yield a robust parametrization, as the correlation factors varied significantly across different days. The outcome could be explained by the fact that, while  $\delta RH$  is the best meteorological proxy, other factors, possibly non-meteorological factors such as plant physiology, also affect BVOCs emission rates.

*ll. 496-499: Here the authors contradict themselves, calling the correlations 'strong' while previously they wrote that they were too weak to predict BVOC emissions (for drought conditions).*

Response: The terms “weak” and “strong” were used to emphasize two different arguments. “too weak to accurately predict their emission rates using  $\delta_{RH}$  values in atmospheric modeling” refers to the ability of modeling to predict BVOCs emission rates based on correlation with  $\delta_{RH}$ , according to the level of correlation we found in our analysis. On lines 496-499, “strong correlation” refers to  $\delta_{RH}$  being the best proxy for BVOC emission rates among all tested meteorological parameters, meaning that,  $\delta_{RH}$  provided the best correlation with BVOCs emission rates (lines 497-498). We have rephrased the sentence on lines 497-499 to make it clearer:

“ $\delta_{RH}$  was the best proxy for BVOC emission rates, as its correlation with MTs and SQTs emission rates ( $r = 0.54$  and  $0.53$ , respectively) was the strongest among all tested meteorological parameters.”

*Technical comments:*

*l. 148: CO, HC, CO<sub>2</sub>, and H<sub>2</sub>O have not been defined previously.*

**Response:** Amended:

“oxidize carbon monoxide (CO) and hydrocarbons (HC) to carbon dioxide (CO<sub>2</sub>) and water (H<sub>2</sub>O).”

*Fig. 4: The legend shows ‘Other monoterpene’. Is that only one other monoterpenes or various MTs? Also, the legend shows ‘Medium’ instead of ‘Median’. Also, this figure does not include the shading in the legend, unlike Fig. 5. This could be harmonized.*

**Response:** Amended:

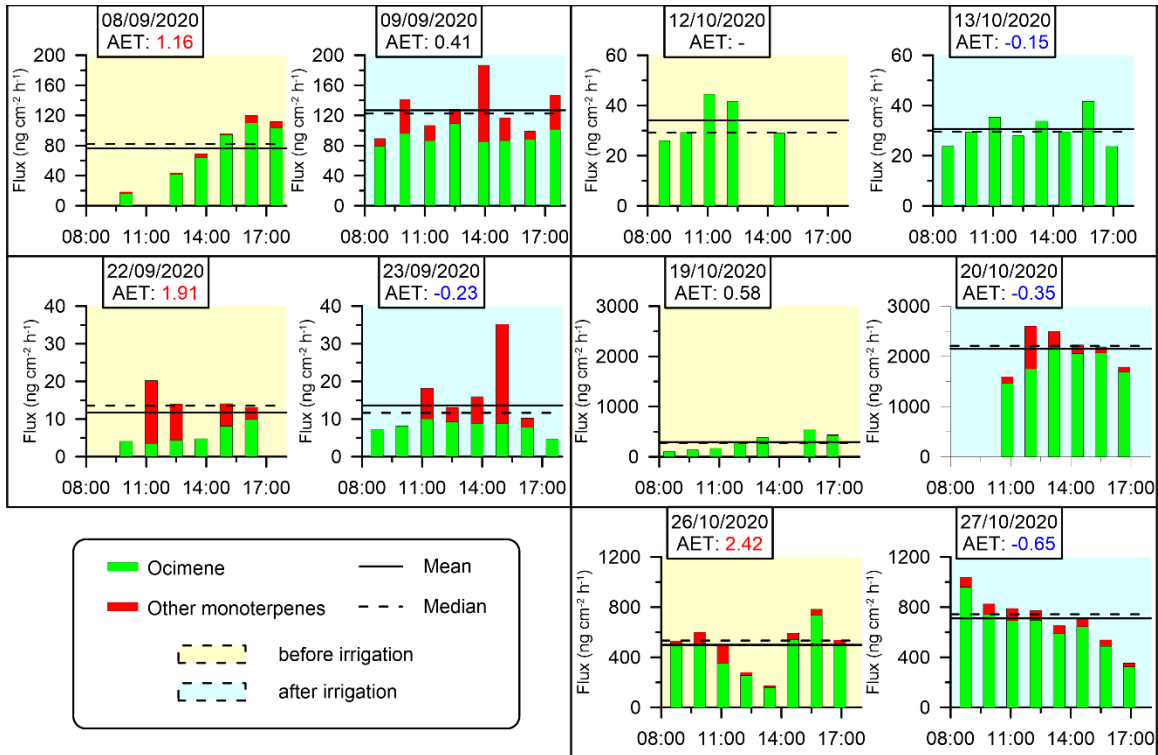

Fig. 5: The legend in this figure also has 'Medium' instead of 'Median'.

Response: Amended:

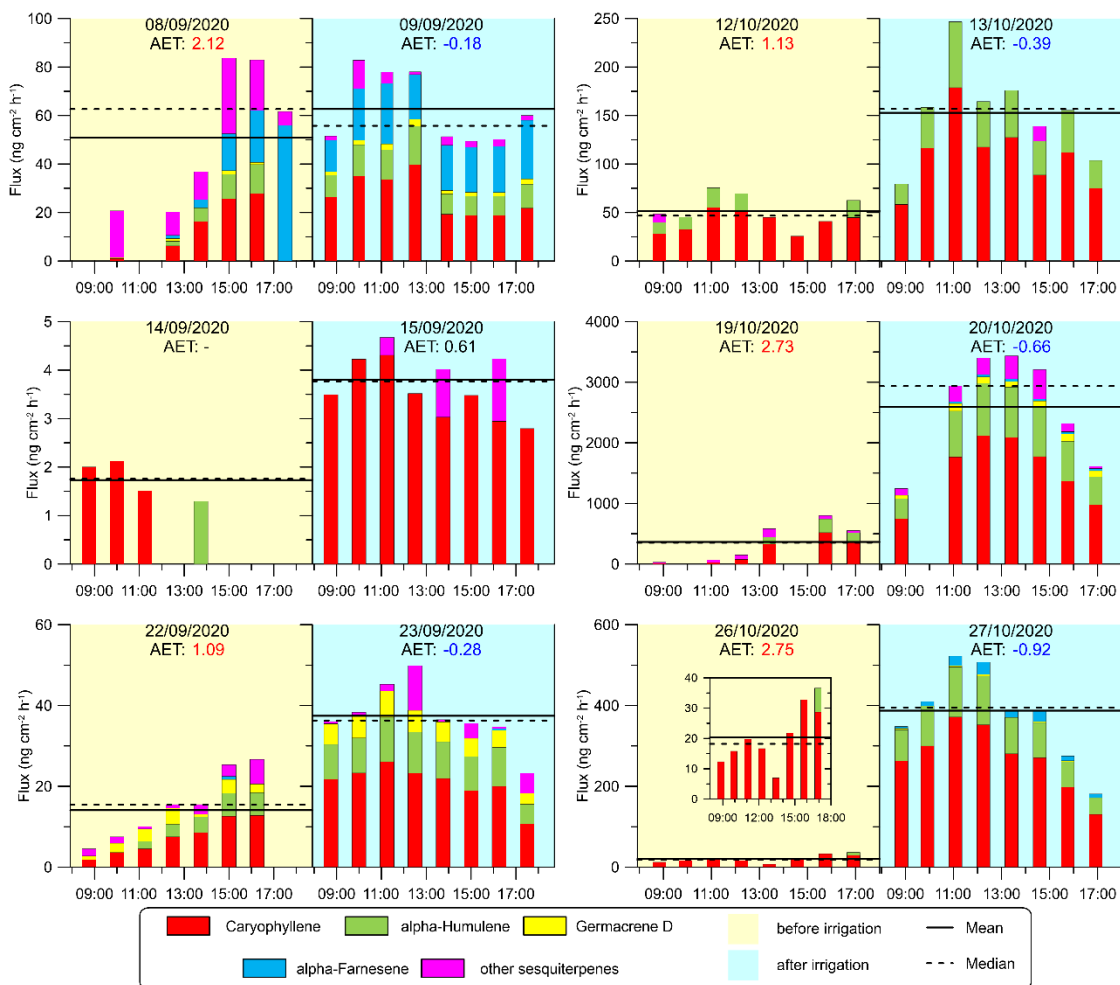

ll. 640-642: *I assume that this manuscript was submitted first, and the companion paper cited has been submitted later, as it seems that the title has changed and the year should be 2024 for the preprint. This should be changed in the final manuscript.*

**Response:** To be done.

*Figs. S1 to S5: It should be explained somewhere what the blue and pink arrows represent.*

**Response:** The arrows have no meaning and therefore have been removed from the figure.

*Section S2's title: There seems to be too many parentheses in this title.*

**Response:** Amended: “**S2. Linear and hyperbolic correlation between MTs/SQTs and temporal changes in RH ( $\delta_{RH}$ )**”
